# Supplementary material for: Supramolecular interactions in boron hydrides: how non-classical bonding directs their crystal architecture
Source: Royal Society of Chemistry journal article supplement (doi:10.1039/c5ce01596k), 2015-01-01
Supplement: c5ce01596k1.pdf [file c5ce01596k1.pdf]

**Supplementary Information**  
**for the manuscript**

**“Supramolecular interactions in boron hydrides: How non-classical  
bonding directs the crystal architecture”**

David J. Wolstenholme,\* Eric J. Fradsham and G. Sean McGrady\*

Department of Chemistry  
University of New Brunswick  
P.O. Box 4400  
Fredericton, N.B., Canada  
E3B 5A3

## S1 Computational Details

The unconstrained geometry optimisations for **1-4** were each performed at the B3LYP/6-311++G(d,p) level of approximation using the Gaussian09 software suite, starting from their experimentally determined geometries.<sup>1</sup> Tight convergence thresholds were imposed on these geometry optimisations with final maximum force and root-mean-square (rms) values as low as 0.000020 and 0.000008 hartrees/bohr, respectively. The subsequent topological analysis of the electron distributions and atomic properties for these systems were carried out using the AIM2000 software, while the  $\delta$  values (delocalisation index) were calculated using the AIMALL package.<sup>2,3</sup> The electrostatic potentials superimposed on isodensity surfaces were generated from the original CIFs of **1-4** using the program CrystalExplorer, in which ‘wavefunction fitting’, DFT/6-311G(d,p), is performed by constraining these calculations to experimental X-ray diffraction data via Tonto.<sup>4,5</sup> This process leads to geometries that are in good agreement with the experimentally determined structures of these boranes, with the exception of the terminal B-H moieties which are fixed to neutron diffraction values for related B-H bonds (1.180 Å).

- [1] M.J. Frisch et al. Gaussian09, Revision A.02, Gaussian Inc., Wallingford, CT (USA), 2009.
- [2] F. Biegler-König, J. Schönbohm, D. Bayles, AIM2000-A program to analyse and visualize atoms in molecules, *J. Comput. Chem.*, 2001, **22**, 545.
- [3] T.A. Keith, *AIMALL*, version 13.05.06, TK Gristmill Software, 2013.
- [4] S.K. Wolff, D.J. Grimwood, J.J. McKinnon, M.J. Turner, D. Jayatilaka, M.A. Spackman, CrystalExplorer (Version 3.1), University of Western Australia, Perth, Australia, 2012.
- [5] D. Jayatilaka, D.J. Grimwood, A. Lee, A. Lemay, A.J. Russel, C. Taylor, S.K. Wolff, Cassam-Chenai and A. Whitton, *Tonto-A System for Computational Chemistry*, 2005.

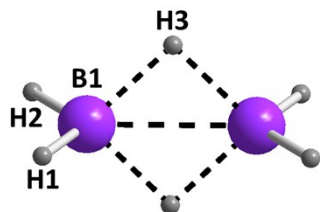

**Figure S1.** Schematic plot of **1**, with labels for the unique atoms.

**Table S1.** Salient geometrical parameters for the experimental and calculated structures of **1** (CE = CrystalExplorer).<sup>5</sup>

| Bond (Å)             | X-Ray    | Opt   | CE    | Angle (°)             | X-Ray     | Opt    | CE     |
|----------------------|----------|-------|-------|-----------------------|-----------|--------|--------|
| B1···B1 <sup>1</sup> | 1.753(3) | 1.765 | 1.753 | B1-H3-B1 <sup>1</sup> | 89.67(4)  | 84.24  | 89.67  |
| B1-H1                | 1.102(2) | 1.186 | 1.180 | H1-B1-H2              | 124.29(6) | 121.83 | 124.29 |
| B1-H2                | 1.078(2) | 1.186 | 1.180 | H1-B1-H3              | 108.48(7) | 108.97 | 109.80 |
| B1-H3                | 1.233(2) | 1.315 | 1.233 | H2-B1-H3              | 109.52(5) | 109.10 | 109.14 |
| B1-H3 <sup>1</sup>   | 1.253(2) | 1.315 | 1.253 |                       |           |        |        |
| H1···H3 <sup>2</sup> | 2.733    | -     | 2.670 |                       |           |        |        |
| H2···H3 <sup>3</sup> | 2.835    | -     | 2.765 |                       |           |        |        |

$${}^1-x,-y,-z \quad {}^20.5+x,-0.5+y,0.5-z \quad {}^30.5-x,0.5-y,0.5+z$$

- [5] H.W. Smith, W.N. Lipscomb, *J. Chem. Phys.*, 1965, **43**, 1060.

**Table S2.** Salient topological parameters of the electron density for the optimised structure of **1**.

| Bond    | $\rho_b(\mathbf{r})$ ( $\text{e}\text{\AA}^{-3}$ ) | $\nabla^2\rho_b(\mathbf{r})$ ( $\text{e}\text{\AA}^{-3}$ ) | $\delta(\mathbf{A},\mathbf{B})$ |
|---------|----------------------------------------------------|------------------------------------------------------------|---------------------------------|
| B1...B1 | -                                                  | -                                                          | 0.097                           |
| B1-H1   | 1.245                                              | -8.042                                                     | 0.607                           |
| B1-H2   | 1.245                                              | -8.042                                                     | 0.607                           |
| B1-H3   | 0.833                                              | 1.866                                                      | 0.348                           |

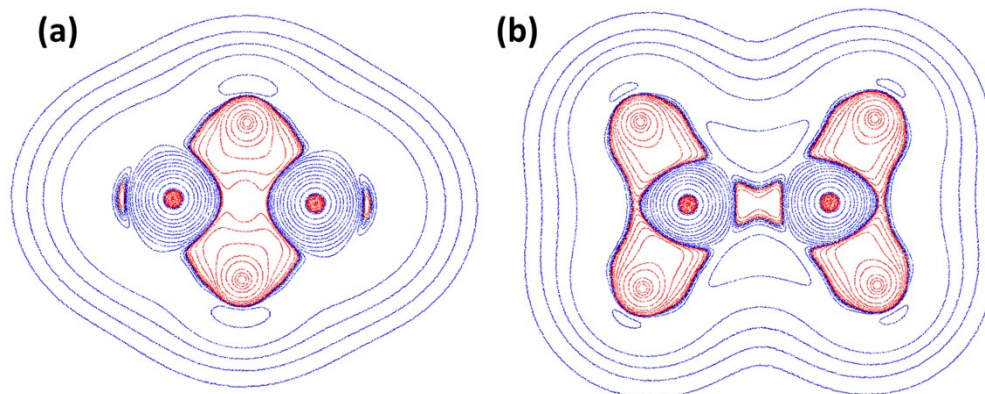

**Figure S2.**  $\nabla^2\rho_b(\mathbf{r})$  plots in the plane of the B1-H3-B1 and H1-B1-B1 bonding in **1**. The positive (blue) and negative (red) contours are plotted in increments of  $2.4 \times 10^{-2}$ ,  $4.8 \times 10^n$ ,  $9.6 \times 10^n$ , and  $1.9 \times 10^{n+1}$  ( $n = -2, -1, 0, 1, 2,$  and  $3$ ).

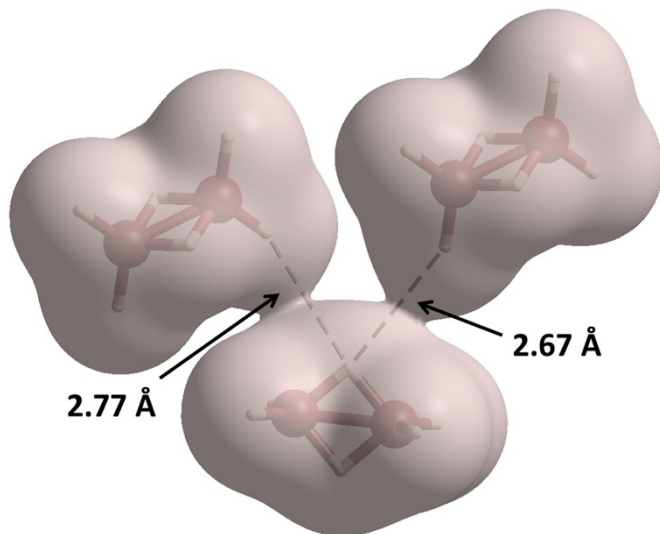

**Figure S3.** Plot of a 0.003 au isodensity surface of **1**, illustrating the maximum amount of density ( $\sim 0.022 \text{ e}\text{\AA}^{-3}$ ) shared by each  $\text{B}_2\text{H}_6$  moiety.

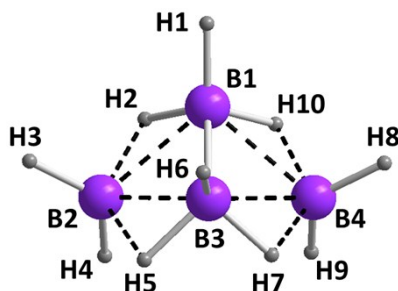

**Figure S4.** Schematic plot of **2** with labels for the unique atoms.

**Table S3.** Salient geometrical parameters for the experimental and calculated structures of **2** (CE = CrystalExplorer).<sup>6</sup>

| Bond (Å)              | X-Ray    | Opt   | CE    | Angle (°)     | X-Ray  | Opt    | CE     |
|-----------------------|----------|-------|-------|---------------|--------|--------|--------|
| B1-B3                 | 1.709(4) | 1.721 | 1.709 | B1···B2···B3  | 55.38  | 55.09  | 55.38  |
| B1···B2               | 1.845(3) | 1.860 | 1.845 | B2···B3···B4  | 99.47  | 98.79  | 99.47  |
| B1···B4               | 1.843(7) | 1.861 | 1.843 | B3···B4···B1  | 55.33  | 55.07  | 55.33  |
| B3···B2               | 1.833(5) | 1.860 | 1.833 | B4···B1···B2  | 98.89  | 98.78  | 98.89  |
| B3···B4               | 1.838(4) | 1.861 | 1.838 | B1-H2···B2    | 91.76  | 88.08  | 91.76  |
| B1-H1                 | 1.157(4) | 1.181 | 1.180 | B2···H5-B3    | 89.30  | 88.07  | 89.30  |
| B1-H2                 | 1.129(3) | 1.257 | 1.129 | B3-H7···B4    | 95.09  | 88.14  | 95.05  |
| B1-H10                | 1.173(3) | 1.257 | 1.173 | B1-H10···B4   | 95.97  | 88.14  | 95.97  |
| B2···H2               | 1.424(4) | 1.414 | 1.424 | H1-B1-H2      | 109.94 | 111.23 | 109.94 |
| B2-H3                 | 1.137(3) | 1.186 | 1.180 | H1-B1-H10     | 112.66 | 111.27 | 112.66 |
| B2-H4                 | 1.086(4) | 1.192 | 1.180 | H2-B1-H10     | 96.74  | 93.82  | 96.74  |
| B2···H5               | 1.413(3) | 1.415 | 1.413 | H2···B2-H3    | 104.01 | 104.72 | 104.01 |
| B3-H5                 | 1.185(2) | 1.257 | 1.185 | H2···B2-H4    | 96.29  | 95.80  | 96.29  |
| B3-H6                 | 1.063(2) | 1.181 | 1.180 | H2···B2···H5  | 130.64 | 137.73 | 130.64 |
| B3-H7                 | 1.141(4) | 1.257 | 1.141 | H3-B2-H4      | 126.74 | 119.02 | 126.74 |
| B4···H7               | 1.344(4) | 1.413 | 1.344 | H3-B2···H5    | 108.62 | 104.67 | 108.62 |
| B4-H8                 | 1.118(2) | 1.186 | 1.180 | H4-B2···H5    | 92.86  | 95.80  | 92.86  |
| B4-H9                 | 1.023(3) | 1.192 | 1.180 | H5-B3-H6      | 108.30 | 111.21 | 108.30 |
| B4···H10              | 1.304(3) | 1.414 | 1.304 | H5-B3-H7      | 92.34  | 93.86  | 92.34  |
| H1···H1 <sup>1</sup>  | 2.714    | -     | 2.671 | H6-B3-H7      | 117.57 | 111.26 | 117.57 |
| H1···H5 <sup>2</sup>  | 2.615    | -     | 2.599 | H7···B4-H8    | 107.82 | 104.78 | 107.82 |
| H1···H8 <sup>3</sup>  | 2.707    | -     | 2.635 | H7···B4-H9    | 95.51  | 95.77  | 95.51  |
| H2···H9 <sup>4</sup>  | 2.896    | -     | 2.768 | H7···B4···H10 | 130.66 | 137.61 | 130.66 |
| H3···H7 <sup>5</sup>  | 2.606    | -     | 2.575 | H8-B4-H9      | 125.33 | 119.01 | 125.33 |
| H3···H10 <sup>6</sup> | 2.644    | -     | 2.616 | H8-B4···H10   | 102.79 | 104.78 | 102.79 |
| H4···H6 <sup>7</sup>  | 2.760    | -     | 2.647 | H9-B4···H10   | 97.24  | 95.74  | 97.24  |
| H4···H9 <sup>4</sup>  | 2.912    | -     | 2.711 |               |        |        |        |
| H4···H10 <sup>4</sup> | 2.728    | -     | 2.649 |               |        |        |        |
| H6···H9 <sup>2</sup>  | 2.739    | -     | 2.522 |               |        |        |        |

<sup>1</sup>1-x,1-y,1-z; <sup>2</sup>0.5+x,0.5-y,0.5+z; <sup>3</sup>1-x,1-y,-z; <sup>4</sup>-x,1-y,-z  
<sup>5</sup>x,y,1+z; <sup>6</sup>0.5-x,-0.5+y,0.5-z; <sup>7</sup>-0.5+x,0.5-y,-0.5+z

[6] E.B. Moore Jr., R.E. Dickerson, W.N. Lipscomb, *J. Chem. Phys.*, 1957, **27**, 209.

**Table S4.** Salient topological parameters of the electron density for the optimised structure of **2**.

| Bond     | $\rho_b(\mathbf{r})$ ( $\text{e}\text{\AA}^{-3}$ ) | $\nabla^2\rho_b(\mathbf{r})$ ( $\text{e}\text{\AA}^{-3}$ ) | $\delta(\mathbf{A},\mathbf{B})$ |
|----------|----------------------------------------------------|------------------------------------------------------------|---------------------------------|
| B1-B3    | 0.905                                              | -5.453                                                     | 0.524                           |
| B1...B2  | -                                                  | -                                                          | 0.151                           |
| B1...B4  | -                                                  | -                                                          | 0.151                           |
| B3...B2  | -                                                  | -                                                          | 0.151                           |
| B3...B4  | -                                                  | -                                                          | 0.151                           |
| B1-H1    | 1.233                                              | -6.735                                                     | 0.670                           |
| B1-H2    | 0.928                                              | 1.755                                                      | 0.473                           |
| B1-H10   | 0.927                                              | 1.764                                                      | 0.473                           |
| B2...H2  | 0.698                                              | 0.139                                                      | 0.310                           |
| B2-H3    | 1.247                                              | -8.030                                                     | 0.615                           |
| B2-H4    | 1.226                                              | -7.674                                                     | 0.593                           |
| B2...H5  | 0.697                                              | 0.132                                                      | 0.309                           |
| B3-H5    | 0.928                                              | 1.748                                                      | 0.474                           |
| B3-H6    | 1.233                                              | -6.733                                                     | 0.670                           |
| B3-H7    | 0.927                                              | 1.771                                                      | 0.474                           |
| B4...H7  | 0.698                                              | 0.181                                                      | 0.310                           |
| B4-H8    | 1.247                                              | -8.031                                                     | 0.616                           |
| B4-H9    | 1.225                                              | -7.674                                                     | 0.593                           |
| B4...H10 | 0.697                                              | 0.173                                                      | 0.310                           |

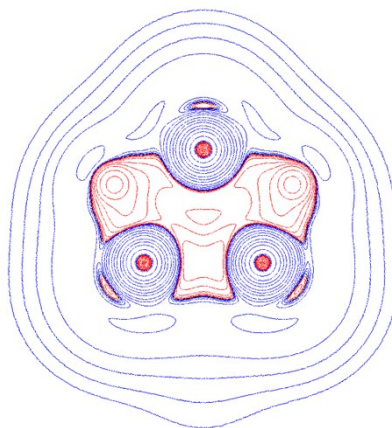

**Figure S5.**  $\nabla^2\rho_b(\mathbf{r})$  plot in the plane of the B1-B2-B3 bonding in **2**. The positive (blue) and negative (red) contours are plotted in increments of  $2.4 \times 10^{-2}$ ,  $4.8 \times 10^{-2}$ ,  $9.6 \times 10^{-2}$ , and  $1.9 \times 10^{-1}$  ( $n = -2, -1, 0, 1, 2,$  and  $3$ ).

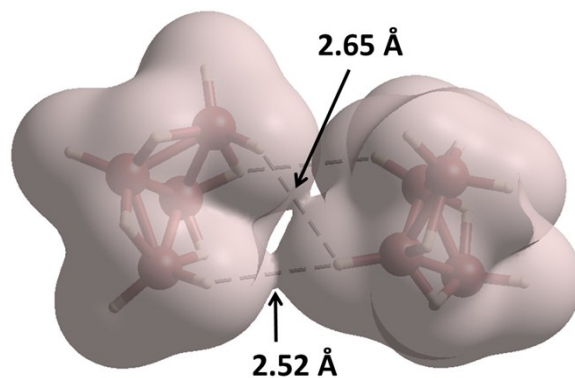

**Figure S6.** Plot of a 0.004 au isodensity surface of **2**, illustrating the maximum amount of density ( $\sim 0.027 \text{ e}\text{\AA}^{-3}$ ) shared for selected B-H $\cdots$ H-B interactions.

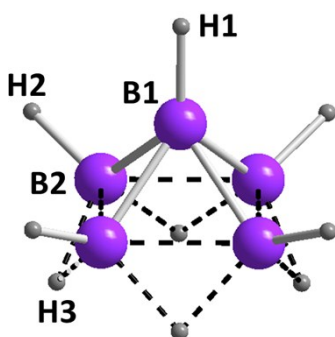

**Figure S7.** Schematic plot of **3** with labels for the unique atoms.

**Table S5.** Salient geometrical parameters for the experimental and calculated structures of **3** (CE = CrystalExplorer).<sup>7</sup>

| Bond (Å)                    | X-Ray     | Opt   | CE    | Angle (°)                  | X-Ray  | Opt    | CE     |
|-----------------------------|-----------|-------|-------|----------------------------|--------|--------|--------|
| B1-B2                       | 1.659(18) | 1.695 | 1.659 | B1-B2 $\cdots$ B2          | 57.71  | 57.96  | 57.71  |
| B2 $\cdots$ B2              | 1.772(15) | 1.798 | 1.772 | H1-B1-B2                   | 130.94 | 131.38 | 130.94 |
| B1-H1                       | 1.21(5)   | 1.178 | 1.180 | H2-B2-B1                   | 114.75 | 131.74 | 114.75 |
| B2-H2                       | 1.20(5)   | 1.180 | 1.180 | B2 $\cdots$ H3 $\cdots$ B2 | 82.27  | 83.81  | 82.27  |
| B2-H3                       | 1.35(5)   | 1.346 | 1.347 | H2-B2 $\cdots$ H3          | 117.41 | 108.07 | 117.41 |
| H1 $\cdots$ H3 <sup>1</sup> | 2.59      | -     | 2.617 |                            |        |        |        |
| H2 $\cdots$ H2 <sup>2</sup> | 2.46      | -     | 2.503 |                            |        |        |        |

<sup>1</sup>-x,-y,1+z; <sup>2</sup>1-x,-y,z

[7] W.J. Dulmage, W.N. Lipscomb, *Acta Cryst.*, 1952, **5**, 260.

**Table S6.** Salient topological parameters of the electron density for the optimised structure of **3**.

| Bond    | $\rho_b(\mathbf{r})$ ( $\text{e}\text{\AA}^{-3}$ ) | $\nabla^2\rho_b(\mathbf{r})$ ( $\text{e}\text{\AA}^{-3}$ ) | $\delta(\mathbf{A},\mathbf{B})$ |
|---------|----------------------------------------------------|------------------------------------------------------------|---------------------------------|
| B1-B2   | 0.913                                              | -3.979                                                     | 0.524                           |
| B2...B2 | -                                                  | -                                                          | 0.283                           |
| B1-H1   | 1.201                                              | -5.472                                                     | 0.752                           |
| B2-H2   | 1.248                                              | -7.820                                                     | 0.688                           |
| B2-H3   | 0.804                                              | 0.295                                                      | 0.403                           |

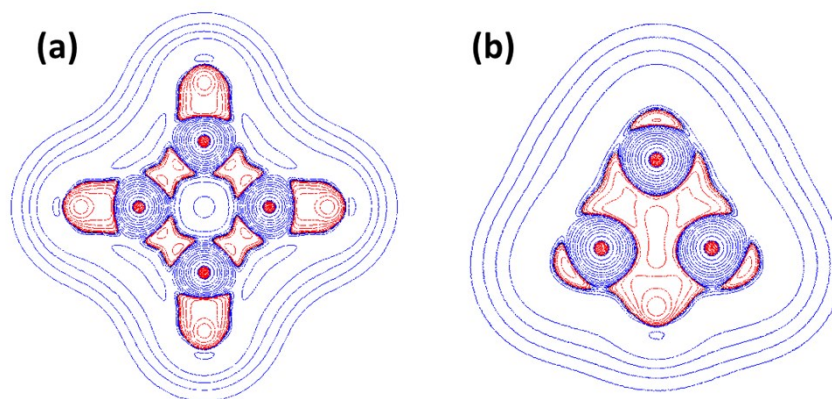

**Figure S8.**  $\nabla^2\rho_b(\mathbf{r})$  plots in the plane of the B2-B2-B2 and B2-B1-B2 bonding in **3**. The positive (blue) and negative (red) contours are plotted in increments of  $2.4 \times 10^{-2}$ ,  $4.8 \times 10^{-2}$ ,  $9.6 \times 10^{-2}$ , and  $1.9 \times 10^{n+1}$  ( $n = -2, -1, 0, 1, 2, \text{ and } 3$ ).

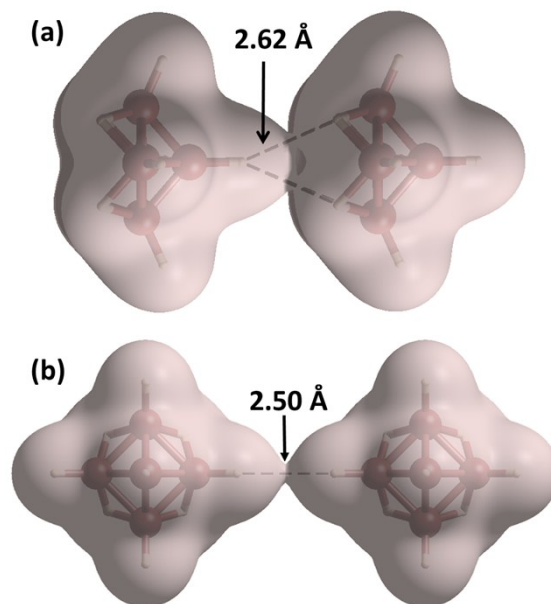

**Figure S9.** Plots of a 0.004 au isodensity surface for **3**, illustrating the maximum amount of density ( $\sim 0.027 \text{ e}\text{\AA}^{-3}$ ) for (a) heteropolar B-H...H-B interactions and (b) homopolar B-H...H-B interactions between each  $\text{B}_5\text{H}_9$  moiety.

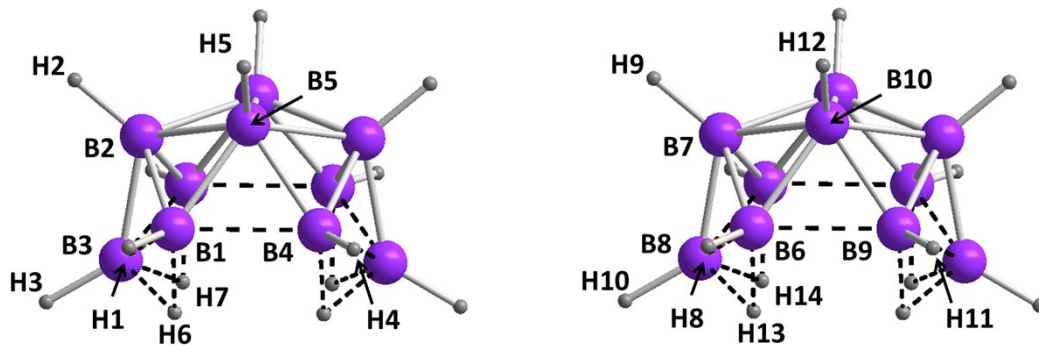

**Figure S10.** Schematic plot of **4** with labels for the unique atoms.

**Table S7.** Salient geometrical parameters for the experimental and calculated structures of **4** (CE = CrystalExplorer).<sup>8</sup>

| Bond (Å)              | X-Ray     | Opt   | CE    | Angle (°) | X-Ray | Opt   | CE    |
|-----------------------|-----------|-------|-------|-----------|-------|-------|-------|
| <b>Molecule 1</b>     |           |       |       |           |       |       |       |
| B1-B2                 | 1.792(2)  | 1.792 | 1.791 | B1-B2-B3  | 61.06 | 61.19 | 61.07 |
| B1-B3                 | 1.790(2)  | 1.790 | 1.790 | B1-B2-B5  | 58.53 | 58.59 | 58.52 |
| B1-B4                 | 1.988(2)  | 1.991 | 1.988 | B1-B5-B4  | 69.22 | 69.35 | 69.17 |
| B1-B5                 | 1.749(2)  | 1.750 | 1.749 | B2-B3-B4  | 61.14 | 61.27 | 61.23 |
| B2-B3                 | 1.731(2)  | 1.724 | 1.731 | B2-B4-B5  | 60.54 | 60.52 | 60.46 |
| B2-B4                 | 1.787(3)  | 1.792 | 1.789 | B2-B5-B5  | 60.22 | 60.00 | 60.01 |
| B2-B5                 | 1.787(2)  | 1.785 | 1.787 | B1-H6-B3  | 83.76 | 84.87 | 83.76 |
| B3-B4                 | 1.782(3)  | 1.790 | 1.780 | B3-H7-B4  | 83.79 | 84.88 | 83.83 |
| B4-B5                 | 1.751(2)  | 1.750 | 1.753 |           |       |       |       |
| B5-B5                 | 1.779(3)  | 1.785 | 1.779 |           |       |       |       |
| B1-H1                 | 1.186(3)  | 1.181 | 1.180 |           |       |       |       |
| B2-H2                 | 1.186(3)  | 1.181 | 1.180 |           |       |       |       |
| B3-H3                 | 1.177(5)  | 1.180 | 1.180 |           |       |       |       |
| B4-H4                 | 1.190(4)  | 1.181 | 1.180 |           |       |       |       |
| B5-H5                 | 1.191(10) | 1.183 | 1.180 |           |       |       |       |
| B1-H6                 | 1.327(4)  | 1.318 | 1.328 |           |       |       |       |
| B3-H6                 | 1.354(2)  | 1.335 | 1.354 |           |       |       |       |
| B3-H7                 | 1.344(4)  | 1.335 | 1.344 |           |       |       |       |
| B4-H7                 | 1.324(4)  | 1.318 | 1.321 |           |       |       |       |
| H1...H9 <sup>1</sup>  | 2.650     | -     | 2.657 |           |       |       |       |
| H1...H10 <sup>2</sup> | 2.569     | -     | 2.574 |           |       |       |       |
| H1...H12 <sup>3</sup> | 2.593     | -     | 2.602 |           |       |       |       |
| H2...H3 <sup>4</sup>  | 2.585     | -     | 2.589 |           |       |       |       |
| H2...H8 <sup>3</sup>  | 2.677     | -     | 2.684 |           |       |       |       |
| H3...H4 <sup>5</sup>  | 2.787     | -     | 2.789 |           |       |       |       |
| H3...H8 <sup>6</sup>  | 2.552     | -     | 2.551 |           |       |       |       |
| H4...H12 <sup>1</sup> | 2.554     | -     | 2.569 |           |       |       |       |
| H4...H13 <sup>2</sup> | 2.653     | -     | 2.660 |           |       |       |       |



|                         |          |   |       |            |       |   |       |
|-------------------------|----------|---|-------|------------|-------|---|-------|
| H5...H6 <sup>4</sup>    | 2.405    | - | 2.411 |            |       |   |       |
| H5...H7 <sup>7</sup>    | 2.413    | - | 2.419 |            |       |   |       |
| H5...H8 <sup>2</sup>    | 2.565    | - | 2.572 |            |       |   |       |
| H5...H11 <sup>3</sup>   | 2.574    | - | 2.588 |            |       |   |       |
| H6...H11 <sup>6</sup>   | 2.617    | - | 2.624 |            |       |   |       |
| <b>Molecule 2</b>       |          |   |       |            |       |   |       |
| B6-B7                   | 1.792(3) | - | 1.792 | B6-B7-B8   | 61.08 | - | 61.08 |
| B6-B8                   | 1.792(2) | - | 1.792 | B6-B7-B10  | 58.57 | - | 58.57 |
| B6-B9                   | 1.986(2) | - | 1.986 | B6-B10-B9  | 69.05 | - | 69.05 |
| B6-B10                  | 1.750(2) | - | 1.750 | B7-B8-B9   | 61.08 | - | 61.08 |
| B7-B8                   | 1.733(2) | - | 1.733 | B7-B9-B10  | 60.49 | - | 60.49 |
| B7-B9                   | 1.787(3) | - | 1.783 | B7-B10-B10 | 60.23 | - | 60.23 |
| B7-B10                  | 1.784(2) | - | 1.784 | B6-H13-B8  | 84.33 | - | 84.33 |
| B8-B9                   | 1.783(3) | - | 1.783 | B8-H14-B9  | 83.60 | - | 83.60 |
| B9-B10                  | 1.755(2) | - | 1.755 |            |       |   |       |
| B10-B10                 | 1.772(3) | - | 1.771 |            |       |   |       |
| B6-H8                   | 1.183(3) | - | 1.180 |            |       |   |       |
| B7-H9                   | 1.185(3) | - | 1.180 |            |       |   |       |
| B8-H10                  | 1.183(4) | - | 1.180 |            |       |   |       |
| B9-H11                  | 1.190(5) | - | 1.180 |            |       |   |       |
| B10-H12                 | 1.193(3) | - | 1.180 |            |       |   |       |
| B6-H13                  | 1.321(4) | - | 1.321 |            |       |   |       |
| B8-H13                  | 1.349(4) | - | 1.349 |            |       |   |       |
| B8-H14                  | 1.346(4) | - | 1.346 |            |       |   |       |
| B9-H14                  | 1.329(4) | - | 1.329 |            |       |   |       |
| H9...H10 <sup>8</sup>   | 2.568    | - | 2.573 |            |       |   |       |
| H9...H10 <sup>9</sup>   | 2.783    | - | 2.787 |            |       |   |       |
| H12...H13 <sup>8</sup>  | 2.415    | - | 2.422 |            |       |   |       |
| H12...H14 <sup>10</sup> | 2.410    | - | 2.413 |            |       |   |       |

<sup>1</sup>-0.5+x,1+y,-z; <sup>2</sup>-0.5+x,1+y,1-z; <sup>3</sup>x,1+y,z; <sup>4</sup>x,y,1+z; <sup>5</sup>0.5+x,y,-z; <sup>6</sup>x,1+y,-1+z; <sup>7</sup>-x,0.5-y,1+z;  
<sup>8</sup>x,y,-1+z; <sup>9</sup>1-x,-1-y,1-z; <sup>10</sup>0.5-x,-1-y,-1+z

[8] R. Brill, H. Dietrich, H. Dierks, *Acta Cryst.*, 1971, **B27**, 2003.

**Table S8.** Salient topological parameters of the electron density for the optimised structure of **4**.

| Bond  | $\rho_b(\mathbf{r})$ (eÅ <sup>-3</sup> ) | $\nabla^2\rho_b(\mathbf{r})$ (eÅ <sup>-3</sup> ) | $\delta(\mathbf{A},\mathbf{B})$ |
|-------|------------------------------------------|--------------------------------------------------|---------------------------------|
| B1-B2 | 0.790                                    | -2.731                                           | 0.428                           |
| B1-B3 | -                                        | -                                                | 0.271                           |
| B1-B4 | -                                        | -                                                | 0.364                           |
| B1-B5 | 0.801                                    | -3.166                                           | 0.500                           |
| B2-B3 | 0.871                                    | -4.153                                           | 0.512                           |
| B2-B4 | 0.790                                    | -2.731                                           | 0.428                           |
| B2-B5 | 0.781                                    | -2.730                                           | 0.430                           |
| B3-B4 | -                                        | -                                                | 0.270                           |

|       |       |        |       |
|-------|-------|--------|-------|
| B4-B5 | 0.801 | -3.164 | 0.500 |
| B5-B5 | 0.782 | -2.187 | 0.465 |
| B1-H1 | 1.256 | -7.944 | 0.700 |
| B2-H2 | 1.231 | -6.674 | 0.734 |
| B3-H3 | 1.262 | -8.406 | 0.675 |
| B4-H4 | 1.256 | -7.945 | 0.698 |
| B5-H5 | 1.234 | -7.069 | 0.724 |
| B1-H6 | 0.817 | 2.068  | 0.425 |
| B3-H6 | 0.839 | -0.631 | 0.412 |
| B3-H7 | 0.839 | -0.630 | 0.412 |
| B4-H7 | 0.817 | 2.069  | 0.425 |

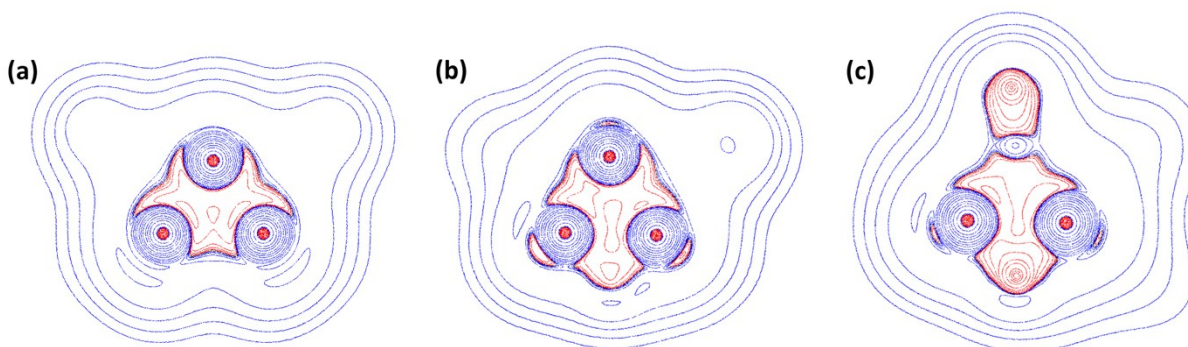

**Figure S11.**  $\nabla^2\rho_b(\mathbf{r})$  plots in the plane of the B1-B5-B4, B1-B2-B3, and B1-H6-B3 bonding in **4**. The positive (blue) and negative (red) contours are plotted in increments of  $2.4 \times 10^{-2}$ ,  $4.8 \times 10^{-2}$ ,  $9.6 \times 10^{-2}$ , and  $1.9 \times 10^{n+1}$  ( $n = -2, -1, 0, 1, 2, \text{ and } 3$ ).

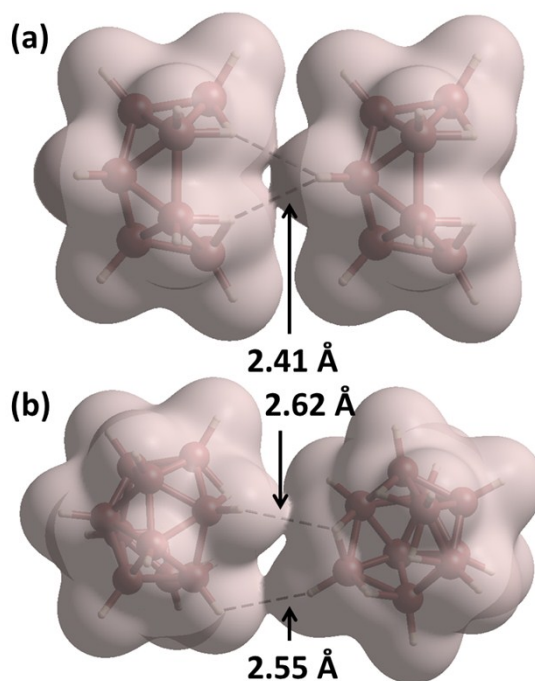

**Figure S12.** Plots of (a) 0.0055 au and (b) 0.004 au isodensity surfaces for **4**, illustrating the maximum amount of density ( $\sim 0.037$  and  $0.027 \text{ e}\text{\AA}^{-3}$ , respectively) shared for selected B-H $\cdots$ H-B interactions.
